# Supplementary material for: Endophytic fungal community composition and function response to strawberry genotype and disease resistance
Source: PeerJ journal article supplement (doi:10.7717/peerj.19383), 2025-05-09
Supplement: Raw_data_for_disease_spot_diameter_(Figure_1B).xlsx [file Raw_data_for_disease_spot_diameter_%28Figure_1B%29.xlsx]

## Sheet: Sheet1
Raw data for disease spot diameter (Figure 1B)
cultivar	Disease spot diameter (cm)
	C. gloeosporioides	A alternata
White Elves	0.2	0.6
	0.1	0.6
	0	0.6
	0	0.3
	0	0.45
	0	0.5
	0	0.4
	0	0
	0	0
	0	0
Tokun	0.4	0.25
	0	0.35
	0	0.75
	0	0.8
	0	0.4
	0	0.4
	0	0.7
	0	0.65
	0	0.6
	0	0.65
Akihime	1.4	0.65
	0.6	0.65
	1.35	0.65
	0.4	0.65
	0.2	0.7
	0	0.7
	0	0.65
	0	0.55
	0	0.5
	0	0
