# Supplementary material for: Endophytic fungal community composition and function response to strawberry genotype and disease resistance
Source: PeerJ journal article supplement (doi:10.7717/peerj.19383), 2025-05-09
Supplement: Table_S1.XLSX [file Table_S1.XLSX]

## Sheet: Sheet1
Table S1 Relative abundance of potential functional profiles of fungal community among three different cultivars in roots, stems, and leaves.
Guild	Relative abundance (%)
	Root			Stem			Leaf
	White Elves	Tokun	Akihime	White Elves	Tokun	Akihime	White Elves	Tokun	Akihime
Plant Pathogen	28.0a	38.7a	43.2a	18.6b	19.0b	56.2a	6.4b	10.7b	41.9a
Undefined Saprotroph	22.0a	18.1a	10.6a	48.0a	6.9b	9.6b	57.6a	9.2b	16.6b
Animal Pathogen-Undefined Saprotroph	1.0b	6.7a	0.0b	8.5b	32.5a	6.4b	9.0a	20.1a	2.7a
Ectomycorrhizal-Endophyte-Ericoid Mycorrhizal-Litter Saprotroph-Orchid Mycorrhizal	30.7a	1.2a	30.5a	0.1a	0.0a	4.5a	1.7a	0.0a	0.2a
Endophyte	7.7a	0.0a	7.4a	0.1a	1.3a	0.3a	0.0b	8.2a	0.5b
Plant Saprotroph-Wood Saprotroph	4.8ab	0.4b	16.0a	0.1a	0.1a	0.0a	0.0a	0.0a	0.9a
Ectomycorrhizal	0.3a	6.3a	0.0a	2.7a	3.6a	2.9a	2.8a	0.9a	2.0a
Endophyte-Plant Pathogen	0.9a	6.1a	0.2a	1.8a	0.0a	1.3a	1.8a	0.1a	2.2a
Animal Endosymbiont-Animal Pathogen-Endophyte-Plant Pathogen-Undefined Saprotroph	0.4a	0.7a	0.1a	1.5a	4.4a	1.1a	1.1a	1.8a	3.0a
Animal Pathogen	0.1a	0.4a	0.0a	2.5a	2.7a	0.1a	2.7a	0.0a	2.8a
Endophyte-Plant Pathogen-Undefined Saprotroph	0.0a	0.0a	0.0a	0.0a	5.6a	0.1a	0.0a	4.1a	0.0a
Ectomycorrhizal-Undefined Saprotroph	0.1a	1.1a	0.0a	0.0a	3.2a	0.0a	0.3a	3.6a	0.1a
Plant Pathogen-Undefined Saprotroph	0.1a	0.0a	0.0a	0.6a	5.1a	0.6a	0.0a	0.8a	0.7a
Plant Pathogen-Wood Saprotroph	0.0a	0.0a	0.0a	0.4a	0.0a	0.4a	3.6a	0.0a	2.9a
Wood Saprotroph	0.1a	1.8a	0.1a	0.0a	0.0a	0.0a	1.7a	2.5a	0.5a
Dung Saprotroph-Plant Saprotroph	0.0a	0.0a	0.0a	0.0a	0.0a	1.4a	0.1a	1.7a	0.6a
Animal Pathogen-Plant Pathogen-Undefined Saprotroph	0.0a	0.2a	0.1a	0.1a	0.2a	0.4a	1.3a	0.0a	0.1a
Undefined Saprotroph-Wood Saprotroph	0.0a	0.2a	0.0a	0.2a	0.6a	0.1a	0.3a	0.0a	0.2a
Animal Parasite-Fungal Parasite	0.0a	0.0a	0.0a	1.0a	0.0a	0.2a	0.0a	0.2a	0.0a
Lichenized-Undefined Saprotroph	0.0a	0.0a	0.0a	0.0a	0.0a	0.0a	0.0a	0.0a	1.4a
Animal Endosymbiont-Undefined Saprotroph	0.2a	0.0a	0.0a	0.3a	0.0a	0.2a	0.5a	0.0a	0.1a
Dung Saprotroph-Wood Saprotroph	0.0a	0.0a	0.0a	0.3a	0.2a	0.2a	0.6a	0.0a	0.0a
Dung Saprotroph	0.1a	0.0a	0.0a	0.2a	0.0a	0.6a	0.1a	0.0a	0.2a
Endophyte-Lichen Parasite-Plant Pathogen-Undefined Saprotroph	0.0a	0.0a	0.0a	0.2a	0.0a	0.1a	0.0a	0.0a	0.9a
Others	0.8-	0.8-	0.6-	1.3-	0.3-	0.6-	3.2-	0.6-	1.4-
unclassified	19.1-	45.6-	12.9-	38.9-	22.4-	26.1-	27.4-	33.3-	29.5-
Unassigned	16.6-	4.7-	11.3-	5.6-	24.9-	19.6-	10.8-	35.2-	21.6-
