# Supplementary material for: Endophytic fungal community composition and function response to strawberry genotype and disease resistance
Source: PeerJ journal article supplement (doi:10.7717/peerj.19383), 2025-05-09
Supplement: Table_S2.XLSX [file Table_S2.XLSX]

## Sheet: Sheet1
Table S2 Relative abundance of fungal genera isolated from roots, stems, and leaves of three strawberry cultivars.
	White Elves			Tokun			Akihime
	Root	Stem	Leaf	Root	Stem	Leaf	Root	Stem	Leaf
Plectosphaerella	0	17.6471	5	31.4286	38.8889	21.6216	21.2121	26.3158	5
Talaromyces	13.5593	35.2941	30	0	5.55556	5.40541	12.1212	5.26316	5
Trichoderma	27.1186	0	0	2.85714	0	5.40541	18.1818	0	5
Penicillium	15.2542	0	5	0	16.6667	2.7027	12.1212	0	15
Umbelopsis	20.339	0	0	0	0	0	18.1818	10.5263	0
Aspergillus	0	5.88235	0	25.7143	5.55556	13.5135	3.0303	0	0
Colletotrichum	1.69492	17.6471	5	0	5.55556	2.7027	3.0303	10.5263	25
Acremonium	0	0	0	8.57143	0	8.10811	0	5.26316	20
Cladosporium	0	0	5	2.85714	0	18.9189	0	0	10
Nigrospora	0	5.88235	35	0	0	2.7027	0	0	10
Gibellulopsis	0	5.88235	5	2.85714	11.1111	5.40541	0	5.26316	0
Phialemonium	0	0	0	11.4286	5.55556	2.7027	0	0	0
Phaeoacremonium	0	0	0	0	0	0	3.0303	21.0526	0
Alternaria	1.69492	0	5	0	0	0	3.0303	5.26316	0
Stagonosporopsis	3.38983	11.7647	0	0	0	0	0	0	0
Trichomonascus	1.69492	0	0	2.85714	5.55556	0	0	0	0
Acrophialophora	0	0	0	5.71429	0	0	0	0	0
Chaetomium	0	0	0	0	0	5.40541	0	0	0
Ectophoma	3.38983	0	0	0	0	0	0	0	0
Fusarium	1.69492	0	0	0	0	0	3.0303	0	0
Paecilomyces	0	0	0	2.85714	0	2.7027	0	0	0
Xenoacremonium	3.38983	0	0	0	0	0	0	0	0
Arcopilus	1.69492	0	0	0	0	0	0	0	0
Arthrinium	0	0	0	0	0	0	0	5.26316	0
Cephalotheca	0	0	0	2.85714	0	0	0	0	0
Daldinia	0	0	5	0	0	0	0	0	0
Goidanichiella	1.69492	0	0	0	0	0	0	0	0
Halenospora	0	0	0	0	0	0	3.0303	0	0
Hypoxylon	0	0	0	0	0	2.7027	0	0	0
Paraboeremia	0	0	0	0	0	0	0	0	5
Parascedosporium	0	0	0	0	5.55556	0	0	0	0
Pilidium	0	0	0	0	0	0	0	5.26316	0
Pygmaeomyces	1.69492	0	0	0	0	0	0	0	0
Sporothrix	1.69492	0	0	0	0	0	0	0	0
