# Supplementary material for: Endophytic fungal community composition and function response to strawberry genotype and disease resistance
Source: PeerJ journal article supplement (doi:10.7717/peerj.19383), 2025-05-09
Supplement: Table_S3.XLSX [file Table_S3.XLSX]

## Sheet: Sheet1
Table S3 Relative abundance of corresponding genera isolated from endophytic fungi in ITS high-throughput sequencing.
	White Elves			Tokun			Akihime
	Root	Stem	Leaf	Root	Stem	Leaf	Root	Stem	Leaf
Plectosphaerella	5.26316	11.2782	0.827068	25.4887	4.96241	3.45865	18.7218	32.6316	18.0451
Talaromyces	13.4586	31.5038	33.3083	0.225564	0	0	6.16541	2.70677	2.55639
Trichoderma	0.150376	0	1.50376	2.85714	0	0.977444	0.526316	0.150376	0.075188
Penicillium	0.150376	0.150376	1.05263	0.075188	0	0.075188	0.150376	0.225564	0.977444
Umbelopsis	0	0	0	0	0.075188	0	0	0	0
Aspergillus	0.37594	5.71429	2.93233	12.8571	6.91729	1.57895	0	2.10526	2.10526
Colletotrichum	0.676692	1.35338	1.35338	4.58647	0	0	0.150376	0.977444	1.65414
Acremonium	0	0.601504	0.075188	1.20301	0	2.03008	0.300752	0.37594	1.12782
Cladosporium	0.150376	1.35338	0.526316	0	0.225564	0.300752	0	0.676692	0.075188
Nigrospora	0	1.35338	4.73684	0	0	0	0	1.20301	5.86466
Gibellulopsis	0.075188	0.300752	0.37594	2.70677	3.23308	3.7594	0.150376	4.58647	3.45865
Phialemonium	0	0	0	7.29323	0	0.451128	0	0	0
Phaeoacremonium	12.8571	0	0	0	0	0	11.5789	0.225564	0
Alternaria	0.075188	0.676692	0.37594	0.225564	0	1.42857	0.37594	0.676692	1.80451
Stagonosporopsis	0.225564	0.150376	0.225564	0	0	0	1.80451	0.37594	1.12782
Acrophialophora	0	0	0	0	0	0	0	0.075188	0
Chaetomium	0	0	0.225564	0.075188	0	0	0	0.451128	0.150376
Fusarium	0.827068	0.300752	1.20301	0	1.65414	0.150376	5.71429	2.10526	1.65414
Xenoacremonium	6.61654	0	0.150376	0	0	0	0.225564	0	0
Halenospora	0	0	0	0	0	0.075188	0	0	0
Parascedosporium	0	0	0	0.300752	0.37594	0.150376	0	0	0
Pilidium	1.95489	0	0.300752	0	0	0	0.075188	0.075188	4.51128
Sporothrix	0.225564	0	0	0	0	0	0.225564	0	0
Others	56.9173	45.2632	50.8271	42.1053	82.5564	85.5639	53.8346	50.3759	54.812
