# Supplementary material for: Endophytic fungal community composition and function response to strawberry genotype and disease resistance
Source: PeerJ journal article supplement (doi:10.7717/peerj.19383), 2025-05-09
Supplement: Table_S4.docx [file Table_S4.docx]

Table S4 Number of fungal strains isolated from roots, stems, and leaves of three strawberry cultivars.

|  | White Elves | | | Tokun | | | Akihime | | |
| --- | --- | --- | --- | --- | --- | --- | --- | --- | --- |
|  | Root | Stem | Leaf | Root | Stem | Leaf | Root | Stem | Leaf |
| *Plectosphaerella cucumerina* | 0 | 3 | 1 | 11 | 7 | 5 | 7 | 4 | 1 |
| *Trichoderma hamatum* | 9 | 0 | 0 | 0 | 0 | 0 | 5 | 0 | 1 |
| *Aspergillus fumigatus* | 0 | 1 | 0 | 9 | 1 | 4 | 0 | 0 | 0 |
| *Umbelopsis vinacea* | 10 | 0 | 0 | 0 | 0 | 0 | 2 | 1 | 0 |
| *Colletotrichum siamense* | 0 | 2 | 1 | 0 | 1 | 1 | 1 | 2 | 4 |
| *Talaromyces kabodanensis* | 7 | 3 | 2 | 0 | 0 | 0 | 0 | 0 | 0 |
| *Cladosporium oxysporum* | 0 | 0 | 1 | 2 | 0 | 4 | 0 | 0 | 2 |
| *Acremonium sclerotigenum* | 0 | 0 | 0 | 2 | 0 | 2 | 0 | 1 | 3 |
| *Gibellulopsis nigrescens* | 0 | 1 | 1 | 1 | 2 | 2 | 0 | 1 | 0 |
| *Nigrospora oryzae* | 0 | 1 | 5 | 0 | 0 | 0 | 0 | 0 | 2 |
| *Phialemonium inflatum* | 0 | 0 | 0 | 4 | 1 | 1 | 0 | 0 | 0 |
| *Talaromyces verruculosus* | 0 | 0 | 1 | 0 | 0 | 1 | 3 | 1 | 0 |
| *Trichoderma asperellum* | 3 | 0 | 0 | 1 | 0 | 2 | 0 | 0 | 0 |
| *Penicillium citrinum* | 2 | 0 | 1 | 0 | 1 | 0 | 0 | 1 | 0 |
| *Talaromyces wushanicus* | 1 | 2 | 2 | 0 | 0 | 0 | 0 | 0 | 0 |
| *Umbelopsis isabellina* | 1 | 0 | 0 | 0 | 0 | 0 | 3 | 1 | 0 |
| *Alternaria alternata* | 1 | 0 | 1 | 0 | 0 | 0 | 1 | 1 | 0 |
| *Penicillium citreonigrum* | 1 | 0 | 0 | 0 | 0 | 1 | 0 | 0 | 2 |
| *Penicillium verruculosum* | 0 | 0 | 0 | 0 | 0 | 0 | 2 | 2 | 0 |
| *Acremonium alternatum* | 0 | 0 | 0 | 1 | 0 | 1 | 0 | 0 | 1 |
| *Cladosporium cladosporioides* | 0 | 0 | 0 | 0 | 0 | 3 | 0 | 0 | 0 |
| *Plectosphaerella niemeijerarum* | 0 | 0 | 0 | 0 | 0 | 2 | 0 | 1 | 0 |
| *Stagonosporopsis pogostemonis* | 2 | 1 | 0 | 0 | 0 | 0 | 0 | 0 | 0 |
| *Trichomonascus vanleenenianus* | 1 | 0 | 0 | 1 | 1 | 0 | 0 | 0 | 0 |
| *Acrophialophora ellipsoidea* | 0 | 0 | 0 | 2 | 0 | 0 | 0 | 0 | 0 |
| *Colletotrichum gloeosporioides* | 1 | 0 | 0 | 0 | 0 | 0 | 0 | 0 | 1 |
| *Ectophoma multirostrata* | 2 | 0 | 0 | 0 | 0 | 0 | 0 | 0 | 0 |
| *Nigrospora sphaerica* | 0 | 0 | 2 | 0 | 0 | 0 | 0 | 0 | 0 |
| *Paecilomyces maximus* | 0 | 0 | 0 | 1 | 0 | 1 | 0 | 0 | 0 |
| *Penicillium spinulosum* | 2 | 0 | 0 | 0 | 0 | 0 | 0 | 0 | 0 |
| *Penicillium steckii* | 0 | 0 | 0 | 0 | 2 | 0 | 0 | 0 | 0 |
| *Penicillium thomii* | 2 | 0 | 0 | 0 | 0 | 0 | 0 | 0 | 0 |
| *Talaromyces siamensis* | 0 | 0 | 0 | 0 | 0 | 0 | 1 | 0 | 1 |
| *Trichoderma virens* | 1 | 0 | 0 | 0 | 0 | 0 | 1 | 0 | 0 |
| *Xenoacremonium falcatus* | 2 | 0 | 0 | 0 | 0 | 0 | 0 | 0 | 0 |
| *Arcopilus aureus* | 1 | 0 | 0 | 0 | 0 | 0 | 0 | 0 | 0 |
| *Arthrinium phaeospermum* | 0 | 0 | 0 | 0 | 0 | 0 | 0 | 1 | 0 |
| *Aspergillus niger* | 0 | 0 | 0 | 0 | 0 | 1 | 0 | 0 | 0 |
| *Aspergillus qilianyuensis* | 0 | 0 | 0 | 0 | 0 | 0 | 1 | 0 | 0 |
| *Cephalotheca sulfurea* | 0 | 0 | 0 | 1 | 0 | 0 | 0 | 0 | 0 |
| *Chaetomium globosum* | 0 | 0 | 0 | 0 | 0 | 1 | 0 | 0 | 0 |
| *Chaetomium subaffine* | 0 | 0 | 0 | 0 | 0 | 1 | 0 | 0 | 0 |
| *Colletotrichum capsici* | 0 | 1 | 0 | 0 | 0 | 0 | 0 | 0 | 0 |
| *Daldinia childiae* | 0 | 0 | 1 | 0 | 0 | 0 | 0 | 0 | 0 |
| *Fusarium oxysporum* | 0 | 0 | 0 | 0 | 0 | 0 | 1 | 0 | 0 |
| *Fusarium verticillioides* | 1 | 0 | 0 | 0 | 0 | 0 | 0 | 0 | 0 |
| *Goidanichiella barronii* | 1 | 0 | 0 | 0 | 0 | 0 | 0 | 0 | 0 |
| *Halenospora varia* | 0 | 0 | 0 | 0 | 0 | 0 | 1 | 0 | 0 |
| *Hypoxylon pilgerianum* | 0 | 0 | 0 | 0 | 0 | 1 | 0 | 0 | 0 |
| *Nigrospora chinensis* | 0 | 0 | 0 | 0 | 0 | 1 | 0 | 0 | 0 |
| *Paraboeremia putaminum* | 0 | 0 | 0 | 0 | 0 | 0 | 0 | 0 | 1 |
| *Parascedosporium putredinis* | 0 | 0 | 0 | 0 | 1 | 0 | 0 | 0 | 0 |
| *Penicillium aculeatum* | 0 | 0 | 0 | 0 | 0 | 0 | 0 | 1 | 0 |
| *Penicillium adametzii* | 0 | 0 | 0 | 0 | 0 | 0 | 1 | 0 | 0 |
| *Penicillium citreosulfuratum* | 1 | 0 | 0 | 0 | 0 | 0 | 0 | 0 | 0 |
| *Penicillium ochrochloron* | 1 | 0 | 0 | 0 | 0 | 0 | 0 | 0 | 0 |
| *Penicillium variratense* | 0 | 0 | 0 | 0 | 0 | 0 | 0 | 0 | 1 |
| *Penicillium vinaceum* | 0 | 0 | 0 | 0 | 0 | 0 | 1 | 0 | 0 |
| *Phaeoacremonium krajdenii* | 0 | 0 | 0 | 0 | 0 | 0 | 1 | 0 | 0 |
| *Pilidium concavum* | 0 | 0 | 0 | 0 | 0 | 0 | 0 | 1 | 0 |
| *Plectosphaerella plurivora* | 0 | 0 | 0 | 0 | 0 | 1 | 0 | 0 | 0 |
| *Pygmaeomyces thomasii* | 1 | 0 | 0 | 0 | 0 | 0 | 0 | 0 | 0 |
| *Sporothrix pallida* | 1 | 0 | 0 | 0 | 0 | 0 | 0 | 0 | 0 |
| *Stagonosporopsis cucurbitacearum* | 0 | 1 | 0 | 0 | 0 | 0 | 0 | 0 | 0 |
| *Talaromyces cellulolyticus* | 0 | 0 | 0 | 0 | 1 | 0 | 0 | 0 | 0 |
| *Talaromyces fusiformis* | 0 | 0 | 0 | 0 | 0 | 1 | 0 | 0 | 0 |
| *Talaromyces pinophilus* | 0 | 0 | 1 | 0 | 0 | 0 | 0 | 0 | 0 |
| *Trichoderma harzianum* | 0 | 1 | 0 | 0 | 0 | 0 | 0 | 0 | 0 |
| *Trichoderma melanomagnum* | 1 | 0 | 0 | 0 | 0 | 0 | 0 | 0 | 0 |
| *Trichoderma pubescens* | 1 | 0 | 0 | 0 | 0 | 0 | 0 | 0 | 0 |
| *Trichoderma viride* | 1 | 0 | 0 | 0 | 0 | 0 | 0 | 0 | 0 |
| *Umbelopsis ramanniana* | 0 | 0 | 0 | 0 | 0 | 0 | 1 | 0 | 0 |
